# Supplementary material for: Standard Biological Parts Knowledgebase
Source: PLoS One. 2011 Feb 24;6(2):e17005. doi: 10.1371/journal.pone.0017005 (PMC3044748; doi:10.1371/journal.pone.0017005)
Supplement: Table S1 — List of Part Registry Categories, attributes obtained from the source database table. (XLSX) [file pone.0017005.s003.xlsx]

## Sheet: unique cat
Parts Registry Categories
//igem_cambridge/favorite
//igem2005/davidson/favorite
//igem2005/mit/favorite
//igem2005/texas/favorite
//igem2006/berkeley/favorite
//igem2006/brown/favorite
//igem2006/cambridge/favorite
//igem2006/davidson/
//igem2006/davidson/favorite
//igem2006/duke/favorite
//igem2006/edinburgh/favorite
//igem2006/eth_zurich/favorite
//igem2006/freiburg/favorite
//igem2006/harvard/favorite
//igem2006/igem2006_tokyo/favorite
//igem2006/imperial/favorite
//igem2006/mississippistate/favorite
//igem2006/missouri/favorite
//igem2006/mit/favorites
//igem2006/ncbs/favorite
//igem2006/penn_state/favorite
//igem2006/pennstate/favorite
//igem2006/prairie_view/favorite
//igem2006/slovenia/favorite
//igem2006/team_name/favorite
//igem2006/texas/favorite
//igem2006/tokyo/favorite
//igem2007/brown/favorite
//igem2007/davidson_missouri_w/favorite
//igem2007/edinburgh/favorite
//igem2007/example/favorite
//igem2007/imperial/favorite
//igem2007/ljubljana/favorite
//igem2007/naples/favorite
//igem2007/ncbs/favorite
//igem2007/ucsf/favorite
//igem2007/ucsf/sandbox
//igem2008/alberta_nint/favorite
//igem2008/bologna/favorite
//igem2008/brown/favorite
//igem2008/browntwo/favorite
//igem2008/calgary_wetware/favorite
//igem2008/caltech/favorite
//igem2008/chiba/favorite
//igem2008/cpu-nanjing/favorite
//igem2008/edinburgh/favorite
//igem2008/esbs-strasbourg/favorite
//igem2008/example/favorite
//igem2008/guelph/favorite
//igem2008/harvard/favorite
//igem2008/igem08_uc_berkeley/favorite
//igem2008/illinois/favorite
//igem2008/imperial_college/favorite
//igem2008/kyoto/favorite
//igem2008/ntu-singapore/favorite
//igem2008/slovenia/favorite
//igem2008/team/favorite
//igem2008/team_epf-lausanne/favorite
//igem2008/team_kuleuven/favorite
//igem2008/team_name/favorite
//igem2008/tudelft/favorite
//igem2008/ucsf/favorite
//igem2008/unipv-pavia/favorite
//igem2008/valencia/favorite
//igem2008/warsaw/favorite
//igem2008/wisconsin/favorite
//labs/haseloff_lab/favorite
//cds
//cds/biosynthesis
//cds/chromatinremodeling
//cds/dnabinding
//cds/enzyme
//cds/enzyme/chromatinremodeling
//cds/enzyme/dnapolymerase
//cds/enzyme/dnase
//cds/enzyme/endonuclease
//cds/enzyme/endonuclease/restriction
//cds/enzyme/exonuclease
//cds/enzyme/ligase
//cds/enzyme/lysis
//cds/enzyme/methylation
//cds/enzyme/phosphorylation
//cds/enzyme/protease
//cds/enzyme/rnap
//cds/enzyme/rnapolymerase
//cds/ligand
//cds/lysis
//cds/membrane
//cds/membrane/channel
//cds/membrane/extracellular
//cds/membrane/lysis
//cds/membrane/pump
//cds/membrane/receptor
//cds/membrane/transporter
//cds/receptor
//cds/receptor/antibody
//cds/selectionmarker
//cds/selectionmarker/antibioticresistance
//cds/transcriptionalregulator
//cds/transcriptionalregulator/activator
//cds/transcriptionalregulator/repressor
//chassis/aferrooxidans
//chassis/bacteriophage/t4
//chassis/bacteriophage/t7
//chassis/eukaryote
//chassis/eukaryote/human
//chassis/eukaryote/pichia
//chassis/eukaryote/yeast
//chassis/miscellaneous
//chassis/multihost
//chassis/prokaryote/bcepacia
//chassis/prokaryote/bsubtilis
//chassis/prokaryote/cyanobacterium
//chassis/prokaryote/ecoli
//chassis/prokaryote/lactobacillus
//chassis/prokaryote/mflorum
//chassis/prokaryote/pananatis
//chassis/prokaryote/pmirabilis
//chassis/prokaryote/pputida
//chassis/prokaryote/reuphora
//chassis/prokaryote/salmonella
//chassis/prokaryote/sespanaensis
//chassis/prokaryote/subtilis
//chassis/prokaryote/synechocystis
//chassis/prokaryote/vharveyi
//classic/composite/uncategorized
//classic/device/uncategorized
//classic/generator/plasmids
//classic/generator/prc
//classic/generator/prct
//classic/generator/rc
//classic/generator/rct
//classic/generator/uncategorized
//classic/intermediate/uncategorized
//classic/inverter/uncategorized
//classic/measurement/o_h
//classic/measurement/uncategorized
//classic/other/uncategorized
//classic/plasmid/measurement
//classic/plasmid/uncategorized
//classic/project/uncategorized
//classic/rbs/uncategorized
//classic/regulatory/other
//classic/regulatory/uncategorized
//classic/reporter
//classic/reporter/constitutive
//classic/reporter/multiple
//classic/reporter/pret
//classic/reporter/ret
//classic/rna/uncategorized
//classic/signalling/receiver
//classic/signalling/sender
//classic/temporary/uncategorized
//direction
//direction/bidirectional
//direction/forward
//direction/reverse
//dna/aptamer
//dna/bioscaffold
//dna/chromosomalintegration
//dna/cloningsite
//dna/conjugation
//dna/nucleotide
//dna/origami
//dna/primerbindingsite
//dna/restrictionsite
//dna/scar
//dna/spacer
//dna/transposome/tn5
//dna/transposon
//function/biofuels
//function/biosynthesis
//function/biosynthesis/ahl
//function/biosynthesis/butanol
//function/biosynthesis/heme
//function/biosynthesis/isoprenoid
//function/biosynthesis/odorant
//function/biosynthesis/phycocyanobilin
//function/biosynthesis/plastic
//function/biosynthesis/pyocyanin
//function/celldeath
//function/cellsignalling
//function/cellsignalling/agra
//function/cellsignalling/cinr
//function/cellsignalling/lasi
//function/cellsignalling/lasr
//function/cellsignalling/luxr
//function/cellsignalling/rhll
//function/cellsignalling/rhlr
//function/coliroid
//function/conjugation
//function/degradation
//function/degradation/ahl
//function/degradation/bisphenol
//function/degradation/cellulose
//function/dna
//function/fret
//function/immunology
//function/metalsensing/copper
//function/metalsensing/iron
//function/metalsensing/lead
//function/mismatchrepair
//function/motility
//function/odor
//function/recombination
//function/recombination/cre
//function/recombination/fim
//function/recombination/flp
//function/recombination/hin
//function/recombination/lambda
//function/recombination/p22
//function/recombination/xer
//function/regulation/transcriptional
//function/reporter
//function/reporter/color
//function/reporter/fluorescence
//function/reporter/light
//function/sensor/lead
//function/sensor/light
//function/structures
//function/tumorkillingbacteria
//plasmid
//plasmid/chromosomalintegration
//plasmid/component/cloningsite
//plasmid/component/insulation
//plasmid/component/origin
//plasmid/component/other
//plasmid/component/primerbindingsite
//plasmid/construction
//plasmid/expression
//plasmid/expression/t7
//plasmid/measurement
//plasmid/sp6
//plasmidbackbone/archive
//plasmidbackbone/assembly
//plasmidbackbone/component/defaultinsert
//plasmidbackbone/component/selectionmarker/antibioticresistance
//plasmidbackbone/copynumber/high
//plasmidbackbone/copynumber/inducible
//plasmidbackbone/copynumber/low
//plasmidbackbone/copynumber/medium
//plasmidbackbone/expression/constitutive
//plasmidbackbone/expression/inducible
//plasmidbackbone/libraryscreening/codingsequence
//plasmidbackbone/libraryscreening/promoter
//plasmidbackbone/libraryscreening/rbscodingsequence
//plasmidbackbone/operation
//plasmidbackbone/proteinfusion
//plasmidbackbone/synthesis
//plasmidbackbone/version/10
//plasmidbackbone/version/3
//plasmidbackbone/version/4
//plasmidbackbone/version/5
//primer/m13
//primer/part/amplification
//primer/part/sequencing
//primer/plasmid/amplification
//primer/reporter/cfp
//primer/reporter/gfp
//primer/reporter/yfp
//primer/sp6
//primer/t3
//primer/t7
//promoter
//promoter/anderson
//promoter/iron
//promoter/logic/ustc
//promoter/stresskit
//proteindomain
//proteindomain/affinity
//proteindomain/binding
//proteindomain/cleavage
//proteindomain/degradation
//proteindomain/dnabinding
//proteindomain/head
//proteindomain/internal
//proteindomain/internal/special
//proteindomain/linker
//proteindomain/localization
//proteindomain/repression
//proteindomain/tail
//proteindomain/transmembrane
//proteintag/affinity
//proteintag/degradation
//rbs/prokaryote/constitutive/anderson
//rbs/prokaryote/constitutive/community
//rbs/prokaryote/constitutive/constitutive
//rbs/prokaryote/constitutive/miscellaneous
//rbs/prokaryote/constitutive/rackham
//rbs/prokaryote/regulated/issacs
//rbs/prokaryotic/constitutive/miscellaneous
//regulation/constitutive
//regulation/multiple
//regulation/negative
//regulation/negativeregulator
//regulation/positive
//regulation/unknown
//ribosome/eukaryote/yeast
//ribosome/prokaryote/bcepacia
//ribosome/prokaryote/bsubtilis
//ribosome/prokaryote/custom
//ribosome/prokaryote/ecoli
//ribosome/prokaryote/pananatis
//ribosome/prokaryote/pputida
//ribosome/prokaryote/salmonella
//ribosome/prokaryote/sespanaensis
//rnap/bacteriophage/sp6
//rnap/bacteriophage/t7
//rnap/eukaryote
//rnap/eukaryote/pichia
//rnap/eukaryote/yeast
//rnap/miscellaneous
//rnap/prokaryote/aferrooxidans
//rnap/prokaryote/ecoli
//rnap/prokaryote/ecoli/sigma24
//rnap/prokaryote/ecoli/sigma25
//rnap/prokaryote/ecoli/sigma32
//rnap/prokaryote/ecoli/sigma54
//rnap/prokaryote/ecoli/sigma70
//rnap/prokaryote/ecoli/sigmas
//rnap/prokaryote/pmirabilis
//rnap/prokaryote/pputida
//rnap/prokaryote/reuphora
//rnap/prokaryote/salmonella
//rnap/prokaryote/subtilis/sigmaa
//rnap/prokaryote/subtilis/sigmab
//rnap/prokaryote/synechocystis
//rnap/prokaryote/vharveyi/sigma54
//terminator/double
//terminator/single
//standard/10
//standard/21
//standard/23
//standard/23regulator
//standard/23regulatortranscriptional
//standard/25
//standard/28
//standard/37
//standard/biobrickfriendly
//standard/none
//t3
//t3/t2
//t3/t4
//test1
receiver
transcriptionalregulator
