# Supplementary material for: Standard Biological Parts Knowledgebase
Source: PLoS One. 2011 Feb 24;6(2):e17005. doi: 10.1371/journal.pone.0017005 (PMC3044748; doi:10.1371/journal.pone.0017005)
Supplement: Table S2 — Promoter parts discovered using SBPkb query, but not found during the manual browsing portion of our work. The descriptions of the 57 additional entries, such as the status and categories are shown in the table and do not reveal a pattern which would explain their exclusion from the Catalog portion of the Parts Registry website. (XLSX) [file pone.0017005.s004.xlsx]

## Sheet: 57 extra in query
Name	Status	Categories	Categories	Categories	Categories
BBa_I748001	Available	promoter	miscellaneous_chassis	miscellaneous_rnap	unknown_regulation
BBa_I764001	Available	promoter	pichia_eukaryote_chassis	pichia_eukaryote_rnap	unknown_regulation
BBa_K089005	Available	promoter	reuphora_prokaryote_chassis	reuphora_prokaryote_rnap	unknown_regulation
BBa_K089006	Available	promoter	reuphora_prokaryote_chassis	reuphora_prokaryote_rnap	unknown_regulation
BBa_K108014	Available	promoter	reuphora_prokaryote_chassis	reuphora_prokaryote_rnap	unknown_regulation
BBa_K108016	Available	promoter	reuphora_prokaryote_chassis	reuphora_prokaryote_rnap	unknown_regulation
BBa_K108025	Available	promoter	pputida_prokaryote_chassis	pputida_prokaryote_rnap	unknown_regulation
BBa_K112126	Available	promoter	miscellaneous_chassis	miscellaneous_rnap	unknown_regulation
BBa_K112148	Available	promoter	ecoli_prokaryote_chassis	ecoli_prokaryote_rnap	negative_regulation
BBa_K112407	Available	promoter	ecoli_prokaryote_chassis	ecoli_prokaryote_rnap	unknown_regulation
BBa_K149001	Available	promoter	yeast_eukaryote_chassis	yeast_eukaryote_rnap	unknown_regulation
BBa_K165015	Available	promoter	yeast_eukaryote_chassis	yeast_eukaryote_rnap	unknown_regulation
BBa_K165016	Available	promoter	yeast_eukaryote_chassis	yeast_eukaryote_rnap	unknown_regulation
BBa_K165032	Available	promoter	yeast_eukaryote_chassis	yeast_eukaryote_rnap	unknown_regulation
BBa_K165033	Available	promoter	yeast_eukaryote_chassis	yeast_eukaryote_rnap	unknown_regulation
BBa_K165035	Available	promoter	yeast_eukaryote_chassis	yeast_eukaryote_rnap	unknown_regulation
BBa_K165036	Available	promoter	yeast_eukaryote_chassis	yeast_eukaryote_rnap	unknown_regulation
BBa_K165037	Available	promoter	yeast_eukaryote_chassis	yeast_eukaryote_rnap	unknown_regulation
BBa_K165038	Available	promoter	yeast_eukaryote_chassis	yeast_eukaryote_rnap	unknown_regulation
BBa_K165039	Available	promoter	yeast_eukaryote_chassis	yeast_eukaryote_rnap	unknown_regulation
BBa_K165040	Available	promoter	yeast_eukaryote_chassis	yeast_eukaryote_rnap	unknown_regulation
BBa_K165042	Available	promoter	yeast_eukaryote_chassis	yeast_eukaryote_rnap	unknown_regulation
BBa_K094002	Building	promoter	ecoli_prokaryote_chassis	sigma70_ecoli_prokaryote_rnap	unknown_regulation
BBa_I735008	Missing	promoter	miscellaneous_chassis	miscellaneous_rnap	unknown_regulation
BBa_I735009	Missing	promoter	miscellaneous_chassis	miscellaneous_rnap	unknown_regulation
BBa_I735010	Missing	promoter	miscellaneous_chassis	miscellaneous_rnap	unknown_regulation
BBa_I723011	Planning	promoter	miscellaneous_chassis	miscellaneous_rnap	unknown_regulation
BBa_I723013	Planning	promoter	miscellaneous_chassis	miscellaneous_rnap	unknown_regulation
BBa_I723018	Planning	promoter	miscellaneous_chassis	miscellaneous_rnap	unknown_regulation
BBa_J16400	Planning	promoter	miscellaneous_chassis	miscellaneous_rnap	unknown_regulation
BBa_J24000	Planning	promoter	miscellaneous_chassis	miscellaneous_rnap	unknown_regulation
BBa_J24001	Planning	promoter	miscellaneous_chassis	miscellaneous_rnap	unknown_regulation
BBa_J48103	Planning	promoter	miscellaneous_chassis	miscellaneous_rnap	unknown_regulation
BBa_J48106	Planning	promoter	miscellaneous_chassis	miscellaneous_rnap	unknown_regulation
BBa_J49000	Planning	promoter	miscellaneous_chassis	miscellaneous_rnap	unknown_regulation
BBa_J54110	Planning	promoter	miscellaneous_chassis	miscellaneous_rnap	unknown_regulation
BBa_J61045	Planning	promoter	miscellaneous_chassis	miscellaneous_rnap	unknown_regulation
BBa_J64931	Planning	promoter	miscellaneous_chassis	miscellaneous_rnap	unknown_regulation
BBa_J70300	Planning	promoter	mflorum_prokaryote_chassis
BBa_K112907	Planning	promoter	miscellaneous_chassis	miscellaneous_rnap	constitutive_regulation
BBa_K177021	Planning	promoter
BBa_K248000	Planning	promoter
BBa_K283031	Planning	stresskit_promoter
BBa_K283038	Planning	promoter
BBa_K174001	Sent	promoter	bsubtilis_prokaryote_chassis		negative_regulation
BBa_K190015	Sent	promoter		transcriptional_regulation_function	negative_regulation
BBa_K190016	Sent	promoter		transcriptional_regulation_function	negative_regulation
BBa_K190017	Sent	promoter		transcriptional_regulation_function	positive_regulation
BBa_K190023	Sent	promoter		transcriptional_regulation_function	negative_regulation
BBa_K200012	Sent	promoter	ecoli_prokaryote_chassis
BBa_K216005	Sent	promoter
BBa_K227007	Sent	promoter			negative_regulation
BBa_K258005	Sent	promoter	transcriptionalregulator_cds
BBa_K284008	Sent	promoter	ecoli_prokaryote_chassis		positive_regulation
BBa_K110007	Unavailable	promoter	yeast_eukaryote_chassis	yeast_eukaryote_rnap	unknown_regulation
BBa_K110008	Unavailable	promoter	yeast_eukaryote_chassis	yeast_eukaryote_rnap	unknown_regulation
BBa_K110009	Unavailable	promoter	yeast_eukaryote_chassis	yeast_eukaryote_rnap	unknown_regulation
